# Supplementary material for: In situ fabricating a Rh/Ga2O3 photothermal catalyst for dry reforming of methane
Source: Royal Society of Chemistry journal article supplement (doi:10.1039/d3cy01298k), 2024-01-01
Supplement: d3cy01298k1.pdf [file d3cy01298k1.pdf]

**In situ fabricating Rh/Ga<sub>2</sub>O<sub>3</sub> photothermal catalyst for dry reforming of methane**

Yuqiao Li <sup>a</sup>, Dezheng Li <sup>a</sup>, Huimin Liu <sup>a\*</sup>, Yiming Lei <sup>a,b\*</sup>, Rongda Zhao <sup>c\*</sup>, Dehua He

<sup>d</sup> Ze Zheng <sup>a</sup>, Hui Luo <sup>a</sup>, Aidi Liu <sup>a</sup>

<sup>a</sup>, School of Chemical and Environmental Engineering, Liaoning University of Technology, Jinzhou 121001, China

<sup>b</sup>, Department of Chemistry, Universitat Autònoma de Barcelona, Cerdanyola del Vallès, Barcelona 08193, Spain

<sup>c</sup>, School of Materials Science and Engineering, Liaoning University of Technology, Jinzhou 121001, China

<sup>d</sup>, Innovative Catalysis Program, Key Lab of Organic Optoelectronics & Molecular Engineering of Ministry of Education, Department of Chemistry, Tsinghua University, Beijing 100084, China

**Table S1.** Surface area and average pore size of Ga<sub>2</sub>O<sub>3</sub>, 1% Rh<sub>2</sub>O<sub>3</sub>/Ga<sub>2</sub>O<sub>3</sub>, ZnO, and 1% Rh<sub>2</sub>O<sub>3</sub>/ZnO.

| Catalysts                                                         | Surface area (m <sup>2</sup> · g <sup>-1</sup> ) | Average pore size (nm) |
|-------------------------------------------------------------------|--------------------------------------------------|------------------------|
| Ga <sub>2</sub> O <sub>3</sub>                                    | 3.9                                              | 19.1                   |
| 1% Rh <sub>2</sub> O <sub>3</sub> /Ga <sub>2</sub> O <sub>3</sub> | 4.6                                              | 21.4                   |
| ZnO                                                               | 4.3                                              | 7.8                    |
| 1% Rh <sub>2</sub> O <sub>3</sub> /ZnO                            | 1.5                                              | 17.4                   |

**Table S2.** The conversion rates of CO<sub>2</sub> and CH<sub>4</sub> were compared with other studies

| Catalyst                                                          | Reaction conditions | Catalytic performance<br>( $\mu\text{mol g}^{-1} \text{min}^{-1}$ ) |                 | Stability (h) | Source    |
|-------------------------------------------------------------------|---------------------|---------------------------------------------------------------------|-----------------|---------------|-----------|
|                                                                   |                     | CO <sub>2</sub>                                                     | CH <sub>4</sub> |               |           |
| Rh/Ga <sub>2</sub> O <sub>3</sub>                                 | Photothermal        | 112                                                                 | 76.3            | 4             | This work |
| Pt-Au/SiO <sub>2</sub>                                            | Photothermal        | 68.6                                                                | 54.5            | 1             | 1         |
| Ni@SiO <sub>2</sub> -yolk                                         | Photothermal        | 510                                                                 | 480             | 5             | 2         |
| Cu <sub>19.8</sub> Ru <sub>0.2</sub>                              | Photothermal        | n.m                                                                 | 4.6             | 20            | 3         |
| NiO <sub>x</sub>                                                  | Thermal             | 12.8                                                                | 17.1            | 20            | 4         |
| 15Ni/Al <sub>2</sub> O <sub>3</sub>                               | Photothermal        | 38.5                                                                | 46.9            | 5             | 5         |
| Rh-Au/SBA-15                                                      | Photothermal        | 60                                                                  | 53.3            | 8             | 6         |
| Rh/Al <sub>2</sub> O <sub>3</sub>                                 | Thermal             | n.m                                                                 | 0.6             | 0.8           | 7         |
| Co-Ce/ZrO <sub>2</sub>                                            | Thermal             | 1.7                                                                 | 1.5             | 6             | 8         |
| Pd <sub>90</sub> Au <sub>10</sub> /Al <sub>2</sub> O <sub>3</sub> | Photothermal        | 1210.6                                                              | 930.3           | 0.5           | 9         |
| 10%Rh/STO                                                         | Photothermal        | 2.6                                                                 | 2.6             | 13            | 10        |

Note: n.m means not mentioned

**Table S3.** ICP-OES detects Rh content.

| Catalyst                                                       | Rh loading (wt%) |
|----------------------------------------------------------------|------------------|
| Ga <sub>2</sub> O <sub>3</sub>                                 | -                |
| Rh <sub>2</sub> O <sub>3</sub> /Ga <sub>2</sub> O <sub>3</sub> | 0.70             |
| ZnO                                                            | -                |
| Rh <sub>2</sub> O <sub>3</sub> /ZnO                            | 0.86             |

**Table S4.** DRM catalytic performance of 1% Rh/Ga<sub>2</sub>O<sub>3-x</sub> and 1% Rh/ZnO<sub>1-x</sub> under photothermal, thermal, and light conditions.

| Catalysts                              | Reaction condition | Reactant        | Conversion ( $\mu\text{mol g}^{-1}\text{min}^{-1}$ ) |
|----------------------------------------|--------------------|-----------------|------------------------------------------------------|
| 1% Rh/Ga <sub>2</sub> O <sub>3-x</sub> | Photothermal       | CO <sub>2</sub> | 112                                                  |
|                                        |                    | CH <sub>4</sub> | 76.3                                                 |
|                                        | Thermal            | CO <sub>2</sub> | 71.9                                                 |
|                                        |                    | CH <sub>4</sub> | 60.4                                                 |
|                                        | Light              | CO <sub>2</sub> | 0                                                    |
|                                        |                    | CH <sub>4</sub> | 0                                                    |
| 1% Rh/ZnO <sub>1-x</sub>               | Photothermal       | CO <sub>2</sub> | 50.8                                                 |
|                                        |                    | CH <sub>4</sub> | 39.3                                                 |
|                                        | Thermal            | CO <sub>2</sub> | 49.9                                                 |
|                                        |                    | CH <sub>4</sub> | 39.3                                                 |
|                                        | Light              | CO <sub>2</sub> | 0                                                    |
|                                        |                    | CH <sub>4</sub> | 0                                                    |

Photothermal reaction conditions: CH<sub>4</sub> : CO<sub>2</sub> = 1 : 1, total flow rate: 10 mL min<sup>-1</sup>, catalyst 0.094 g, reaction time 30 min, reaction temperature 500 °C, 300 W Xe lamp.

Thermal reaction conditions: CH<sub>4</sub> : CO<sub>2</sub> = 1 : 1, total flow rate: 10 mL min<sup>-1</sup>, catalyst 0.094 g, reaction time 30 min, reaction temperature 500 °C.

Light reaction conditions: CH<sub>4</sub> : CO<sub>2</sub> = 1 : 1, total flow rate: 10 mL min<sup>-1</sup>, catalyst 0.094 g, reaction time 30 min, 300 W Xe lamp.

**Table S5.** The contents of oxygen vacancy and lattice oxygen in 1% Rh<sub>2</sub>O<sub>3</sub>/Ga<sub>2</sub>O<sub>3</sub>, 1% Rh/Ga<sub>2</sub>O<sub>3-x</sub>, 1% Rh<sub>2</sub>O<sub>3</sub>/ZnO, 1% Rh/ZnO<sub>1-x</sub> and 1% Rh<sub>2</sub>O<sub>3</sub>/ZrO<sub>2</sub>, 1% Rh/ZrO<sub>2</sub> catalysts.

| Catalysts                                                         | Oxygen vacancy | Lattice oxygen |
|-------------------------------------------------------------------|----------------|----------------|
| 1% Rh <sub>2</sub> O <sub>3</sub> /Ga <sub>2</sub> O <sub>3</sub> | 18.5%          | 81.5%          |
| 1% Rh/Ga <sub>2</sub> O <sub>3-x</sub>                            | 25.3%          | 74.7%          |
| 1% Rh <sub>2</sub> O <sub>3</sub> /ZnO                            | 13.1%          | 86.9%          |
| 1% Rh/ZnO <sub>1-x</sub>                                          | 15.6%          | 84.4%          |
| 1% Rh <sub>2</sub> O <sub>3</sub> /ZrO <sub>2</sub>               | 29.3%          | 70.7%          |
| 1% Rh/ZrO <sub>2</sub>                                            | 30.5%          | 69.5%          |

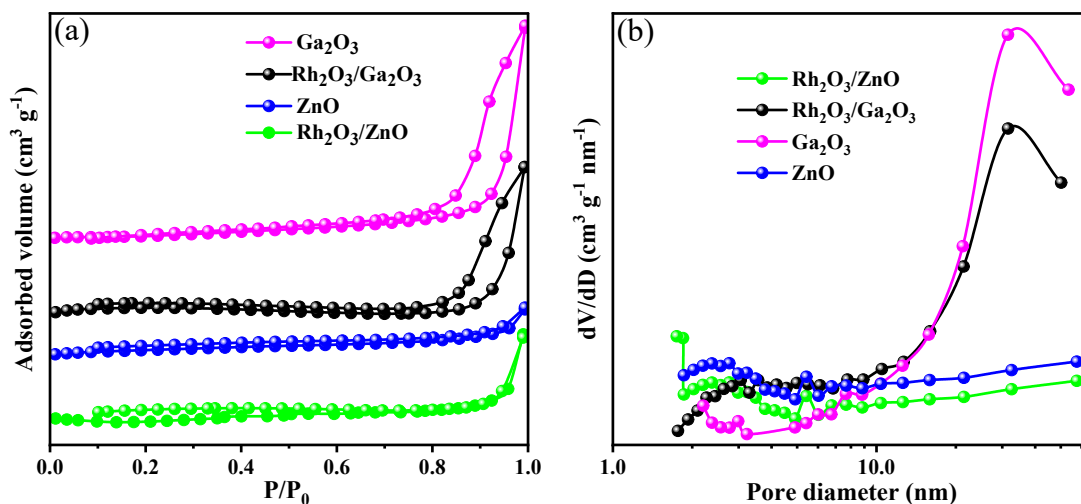

**Figure S1.** (a) N<sub>2</sub> adsorption-desorption isotherms and (b) pore size distribution of Ga<sub>2</sub>O<sub>3</sub>, 1% Rh<sub>2</sub>O<sub>3</sub>/Ga<sub>2</sub>O<sub>3</sub>, ZnO, and 1% Rh<sub>2</sub>O<sub>3</sub>/ZnO.

**Note 1:** All samples have the same N<sub>2</sub> adsorption-desorption isotherms with the IV type isotherm in IUPAC classification and observed with a loop ring of type H<sub>3</sub>.<sup>11</sup> For Rh<sub>2</sub>O<sub>3</sub>/ZnO catalysts, no saturation adsorption platforms appear, indicating irregular mesopore structures of the samples.<sup>12</sup> BET surface area was measured to be 3.9, 4.6, 4.3, and 1.5 m<sup>2</sup> g<sup>-1</sup> for Ga<sub>2</sub>O<sub>3</sub>, 1% Rh<sub>2</sub>O<sub>3</sub>/Ga<sub>2</sub>O<sub>3</sub>, ZnO, and 1% Rh<sub>2</sub>O<sub>3</sub>/ZnO, respectively.

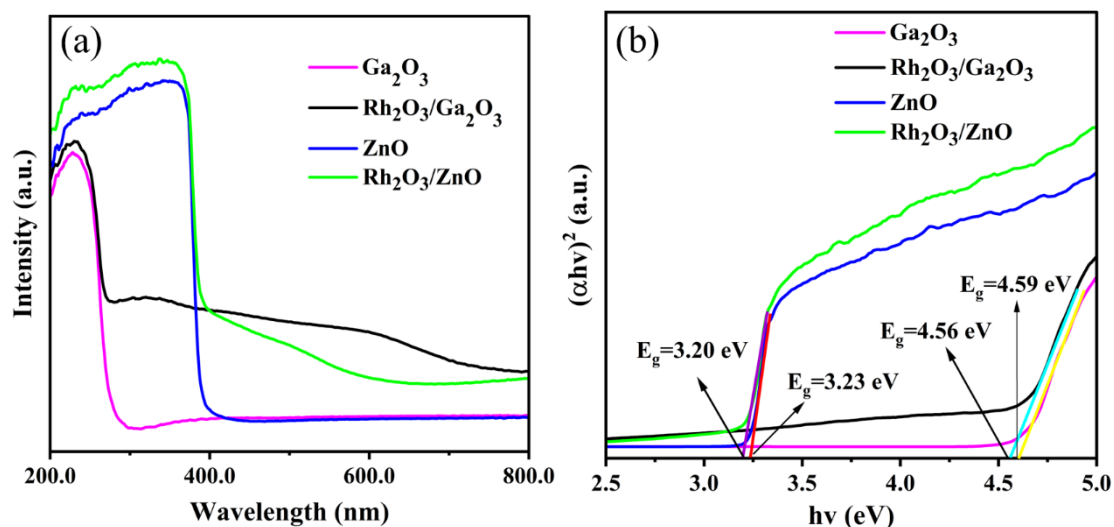

**Figure S2.** (a) UV-vis spectra and (b) band gap of Ga<sub>2</sub>O<sub>3</sub>, ZnO, 1% Rh<sub>2</sub>O<sub>3</sub>/Ga<sub>2</sub>O<sub>3</sub>, and 1% Rh<sub>2</sub>O<sub>3</sub>/ZnO.

**Note 2:** The band edges of pristine ZnO and β-Ga<sub>2</sub>O<sub>3</sub> were 290 and 400 nm, corresponding to 3.23 and 4.59 eV bandgap, respectively (**Fig. S2b**). But Rh<sub>2</sub>O<sub>3</sub> NPs enhanced the light absorption ability of 1% Rh<sub>2</sub>O<sub>3</sub>/Ga<sub>2</sub>O<sub>3</sub> and 1% Rh<sub>2</sub>O<sub>3</sub>/ZnO, especially in the visible light range (400–800 nm) without obviously changing their band gaps.

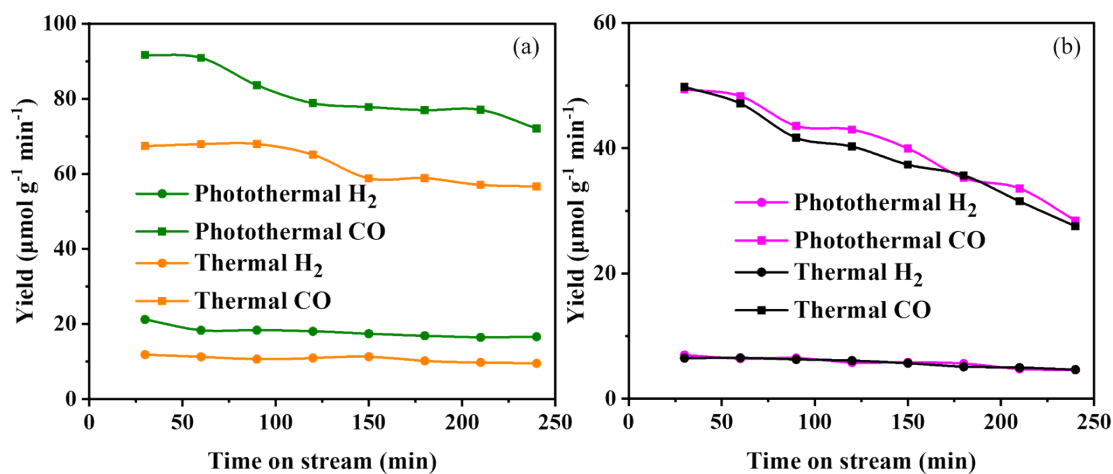

**Figure S3.** H<sub>2</sub> and CO yield on DRM reaction: (a) 1% Rh/Ga<sub>2</sub>O<sub>3-x</sub> and (b) 1% Rh/ZnO<sub>1-</sub>.

x. Reaction conditions: 500 °C, CH<sub>4</sub> : CO<sub>2</sub> = 1 : 1, total flow rate: 10 mL min<sup>-1</sup>, 0.094 g of catalyst, with or without visible light irradiation (300 W Xe lamp).

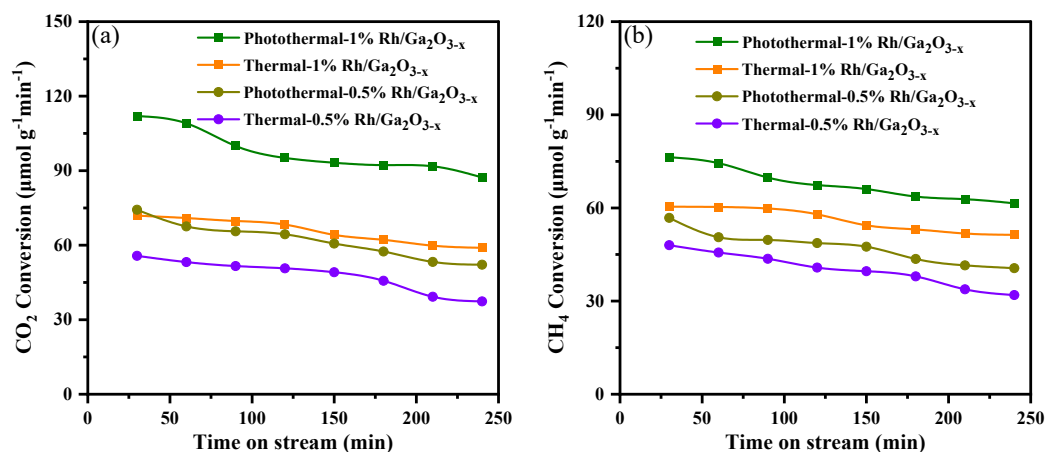

**Figure S4.** DRM catalytic performances over 1% Rh/Ga<sub>2</sub>O<sub>3-x</sub> and 0.5% Rh/Ga<sub>2</sub>O<sub>3-x</sub> : (a) CH<sub>4</sub> conversion and (b) CO<sub>2</sub> conversion. Reaction conditions: 500 °C, CH<sub>4</sub> : CO<sub>2</sub> = 1 : 1, total flow rate: 10 mL min<sup>-1</sup>, 0.094 g of catalyst, with or without visible light irradiation (300 W Xe lamp).

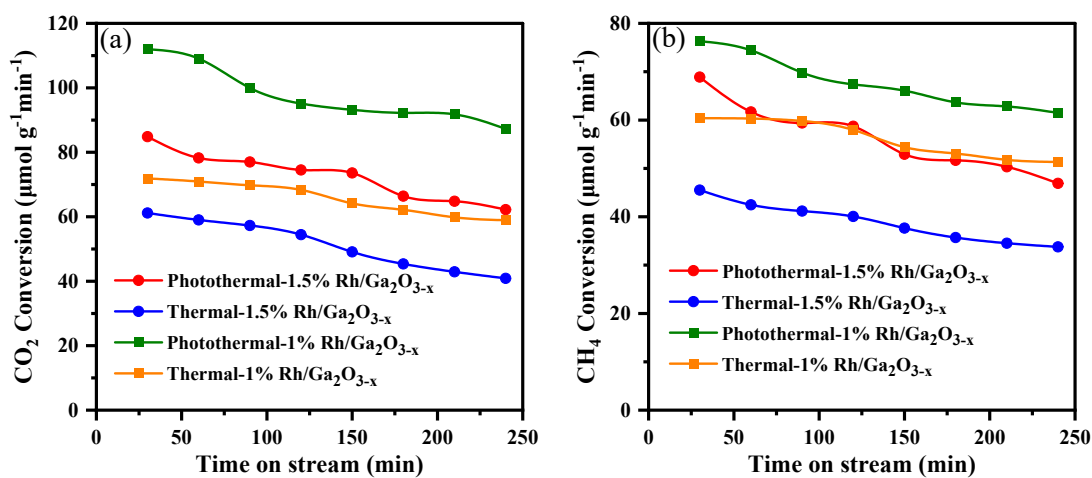

**Figure S5.** DRM catalytic performances over 1% Rh/Ga<sub>2</sub>O<sub>3-x</sub> and 1.5% Rh/Ga<sub>2</sub>O<sub>3-x</sub> :



(a) CH<sub>4</sub> conversion and (b) CO<sub>2</sub> conversion. Reaction conditions: 500 °C, CH<sub>4</sub> : CO<sub>2</sub> = 1 : 1, total flow rate: 10 mL min<sup>-1</sup>, 0.094 g of catalyst, with or without visible light irradiation (300 W Xe lamp).

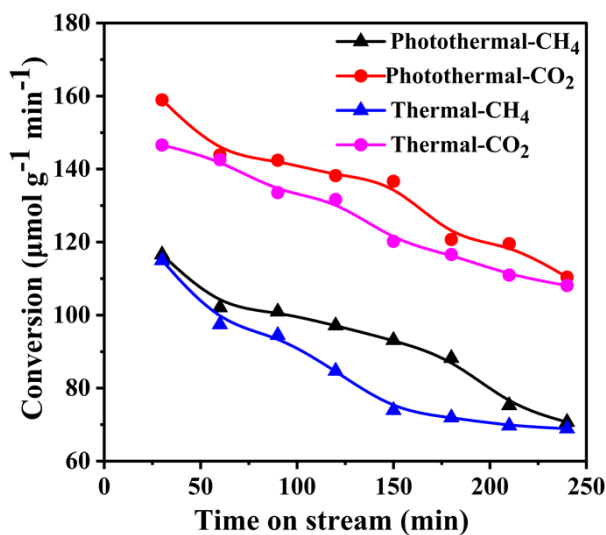

**Figure S6.** DRM catalytic performances over 1% Ru/Ga<sub>2</sub>O<sub>3-x</sub>: CH<sub>4</sub> and CO<sub>2</sub> conversion. Reaction conditions: 500 °C, CH<sub>4</sub> : CO<sub>2</sub> = 1 : 1, total flow rate: 10 mL min<sup>-1</sup>, 0.094 g of catalyst, with or without visible light irradiation (300 W Xe lamp).

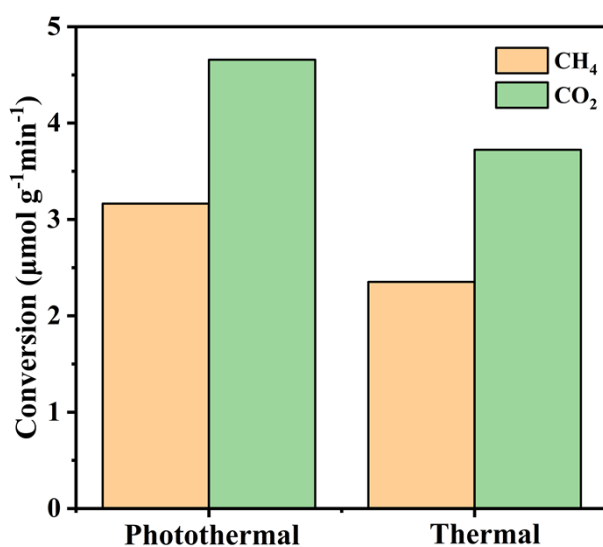

**Figure S7.** DRM catalytic performances over 1% Pd/Ga<sub>2</sub>O<sub>3-x</sub>. Reaction conditions: 500

°C,  $\text{CH}_4 : \text{CO}_2 = 1 : 1$ , total flow rate:  $10 \text{ mL min}^{-1}$ , 0.094 g of catalyst, with or without visible light irradiation (300 W Xe lamp).

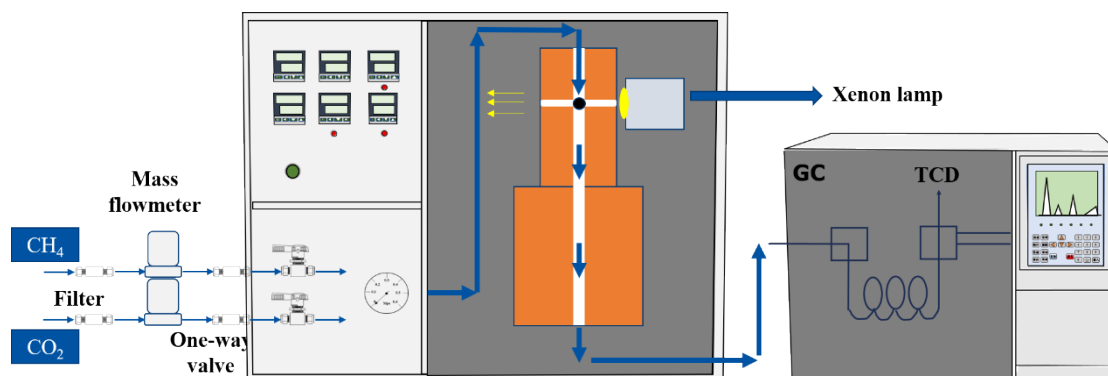

**Figure S8.** Fixed-bed reactor under atmospheric pressure.

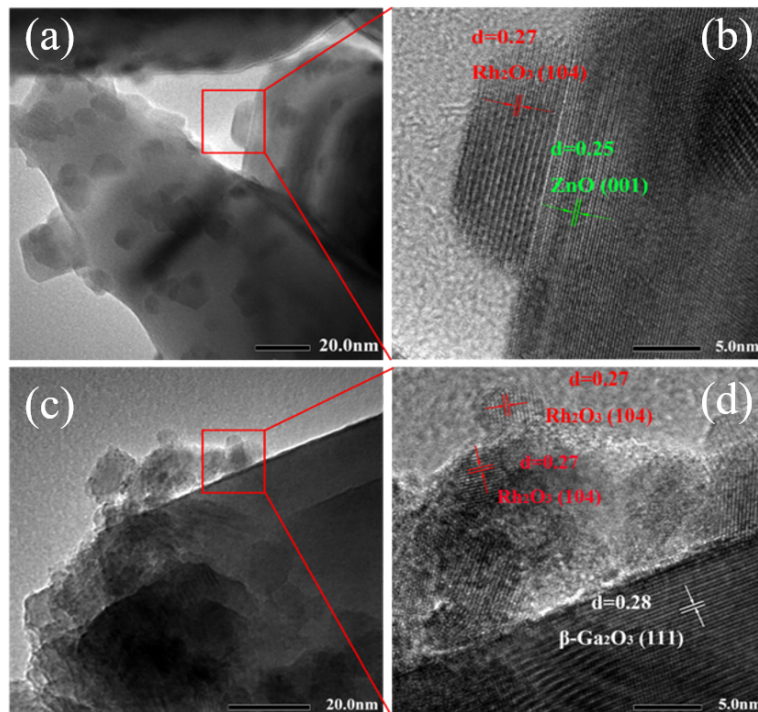

**Figure S9.** (a) TEM and (b) HR-TEM images of 1%  $\text{Rh}_2\text{O}_3/\text{ZnO}$ . (c) TEM and (d) HR-TEM images of 1%  $\text{Rh}_2\text{O}_3/\text{Ga}_2\text{O}_3$ .

**Note 3:** The morphology and crystallinity of 1% Rh<sub>2</sub>O<sub>3</sub>/Ga<sub>2</sub>O<sub>3</sub> and 1% Rh<sub>2</sub>O<sub>3</sub>/ZnO samples were observed by transmission electron microscope (TEM). 1% Rh<sub>2</sub>O<sub>3</sub>/ZnO catalyst had a rod-like structure, and the Rh<sub>2</sub>O<sub>3</sub> nanoparticles (NPs) were uniformly distributed on the ZnO surface (**Figure S9a**). The distances of clear lattice fringes were 0.27 and 0.25 nm shown on the high-resolution TEM (HRTEM) image, corresponding to Rh<sub>2</sub>O<sub>3</sub> and ZnO with the good crystal structure (**Figure S9b**).<sup>13</sup> Similarly, it could be observed that Rh<sub>2</sub>O<sub>3</sub> NPs were loaded on β-Ga<sub>2</sub>O<sub>3</sub> support (d = 0.28), meaning the successful preparation of 1% Rh<sub>2</sub>O<sub>3</sub>/Ga<sub>2</sub>O<sub>3</sub> nanocomposite (**Figure S9c and d**).<sup>14, 15</sup>

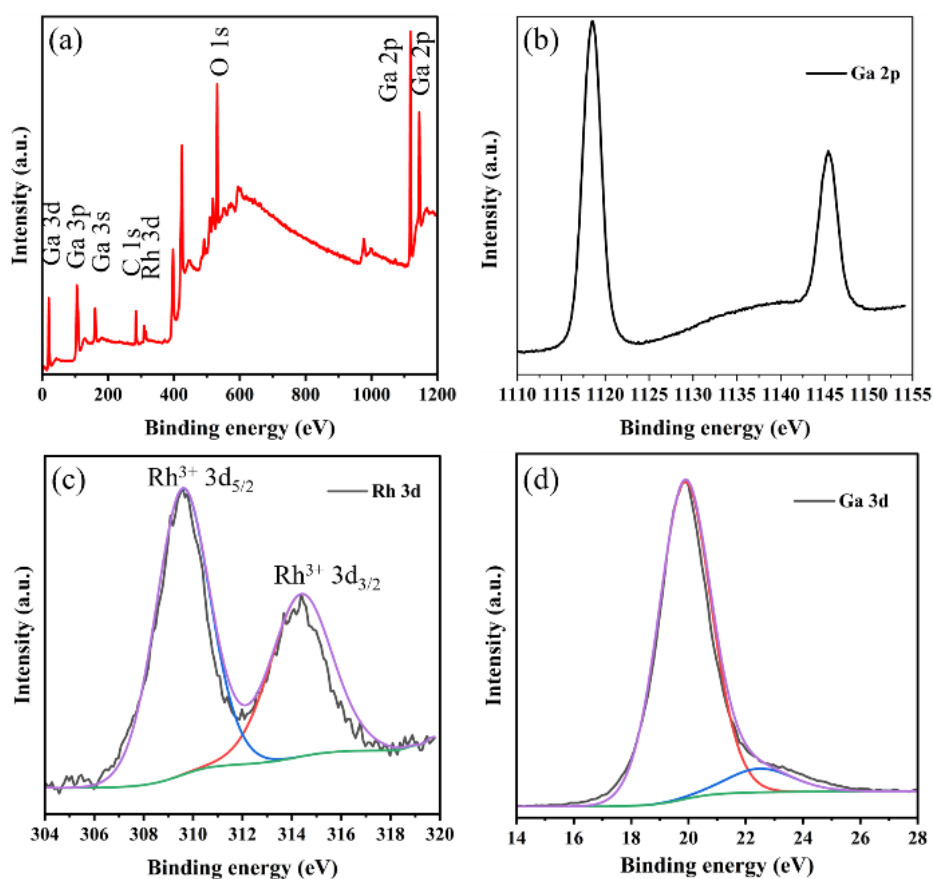

**Figure S10.** (a) XPS spectra of 1% Rh<sub>2</sub>O<sub>3</sub>/Ga<sub>2</sub>O<sub>3</sub>. (b) Ga 2p, (c) Rh 3d and (d) Ga 3d.

**Note 4:** **Figure S10a** revealed the coexistence of C, Ga, O, Rh, and N elements in 1%

Rh<sub>2</sub>O<sub>3</sub>/Ga<sub>2</sub>O<sub>3</sub>. The high-resolution XPS (HR-XPS) spectra of Ga 2p showed two peaks from Ga 2p<sub>3/2</sub> and Ga 2p<sub>1/2</sub> at 1118.53 eV and 1145.42 eV, respectively (**Figure S10b**).<sup>16</sup> Compared to the β-Ga<sub>2</sub>O<sub>3</sub>, the characteristic peaks of Ga 2p and 3d shifted slightly to lower binding energies due to the presence of Rh<sub>2</sub>O<sub>3</sub>.<sup>17</sup> Rh 3d spectra in 1% Rh<sub>2</sub>O<sub>3</sub>/Ga<sub>2</sub>O<sub>3</sub> samples contained two peaks at 309.58 eV and 314.42 eV that can be assigned to Rh 3d<sub>5/2</sub> and Rh 3d<sub>3/2</sub> (**Figure S10c**).<sup>18-19</sup> And a peak of Ga 3d at 19.86 eV, which was attributed to Ga<sup>3+</sup>, was observed in 1% Rh<sub>2</sub>O<sub>3</sub>/Ga<sub>2</sub>O<sub>3</sub>, representing the Ga–O bonding (**Figure S10d**).<sup>16</sup>

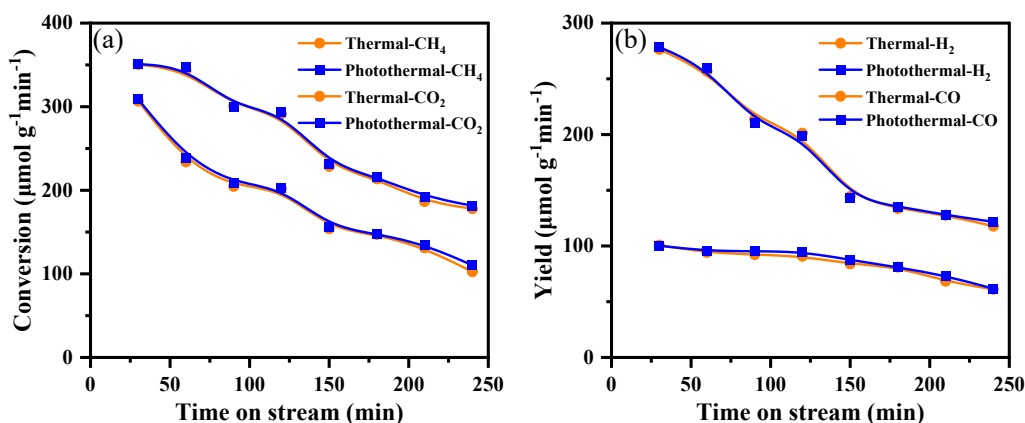

**Figure S11.** DRM catalytic performances over 1% Rh/ZrO<sub>2</sub>: (a) CH<sub>4</sub> and CO<sub>2</sub> conversion and (b) H<sub>2</sub> and CO yield. Reaction conditions: 500 °C, CH<sub>4</sub> : CO<sub>2</sub> = 1 : 1, total flow rate: 10 mL min<sup>-1</sup>, 0.094 g of catalyst, with or without visible light irradiation (300 W Xe lamp).

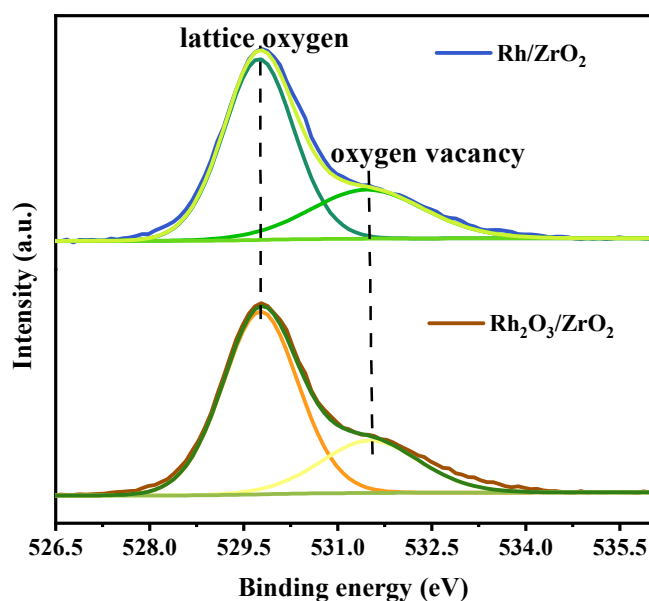

**Figure S12.** O1s XPS spectra of 1% Rh<sub>2</sub>O<sub>3</sub>/ZrO<sub>2</sub> and 1% Rh/ZrO<sub>2</sub>.

**Note 5:** To further elucidate the role of oxygen vacancies, ZrO<sub>2</sub> with good stability and excellent catalytic performance was selected as the substrate to produce 1% Rh/ZrO<sub>2</sub> sample via the same preparation method. The DRM reactions were carried out over 1%

Rh/ZrO<sub>2</sub> under the same reaction conditions. The results showed that the photothermal catalytic performance of the 1% Rh/ZrO<sub>2</sub> catalyst was similar to thermal catalytic activity (**Figure S11**). The surface chemical properties of the catalyst were characterized by XPS (**Figure S12**), and the oxygen vacancy content of the catalyst before and after the reaction was calculated (**Table S5**). Before and after the DRM reaction, the content of oxygen vacancy in 1% Rh/ZrO<sub>2</sub> had only a slight variation. This indicated the enhancement effect of oxygen vacancies in the Rh/Ga<sub>2</sub>O<sub>3-x</sub> system.

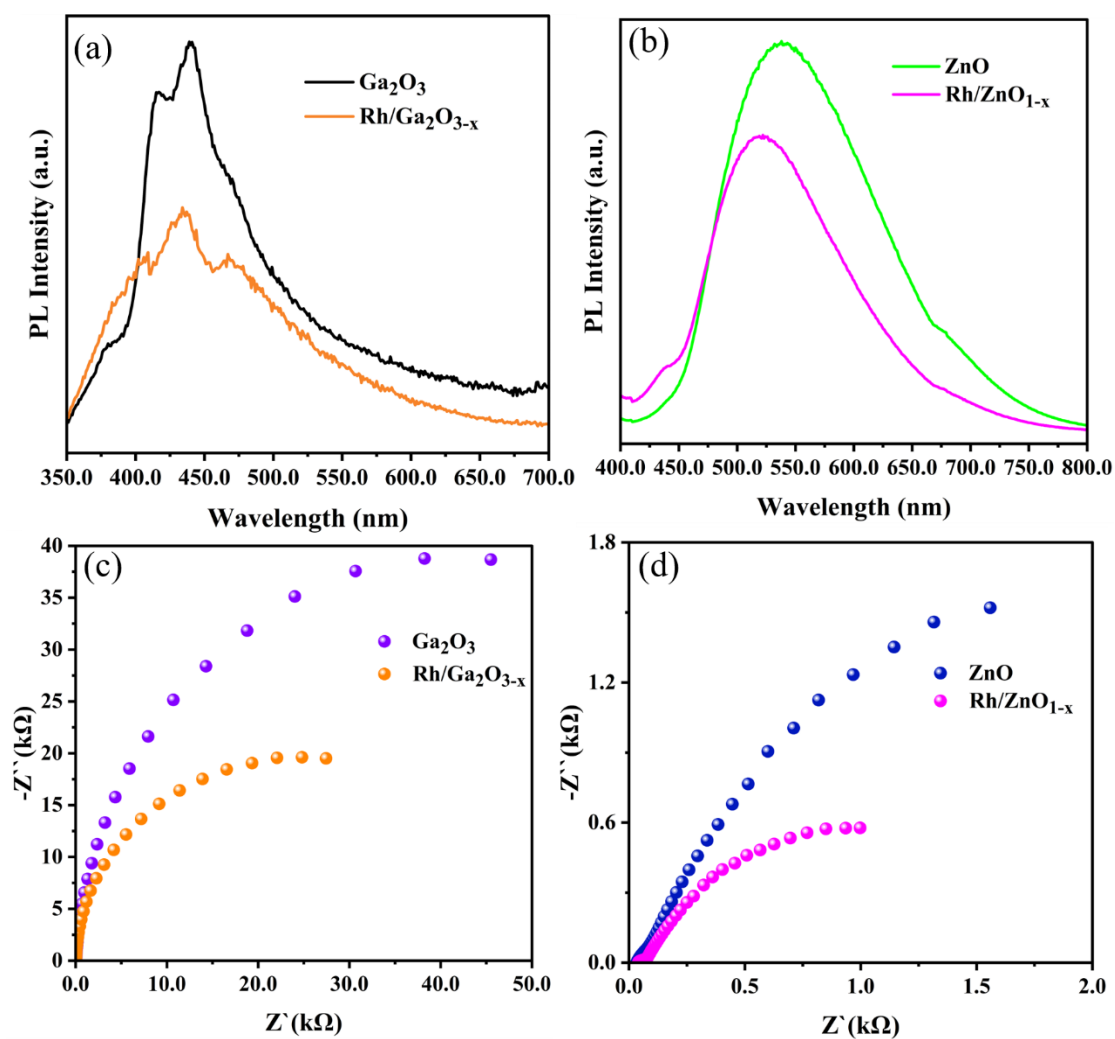

**Figure S13.** (a and b) PL and (c and d) EIS spectra of Ga<sub>2</sub>O<sub>3</sub>, 1% Rh/Ga<sub>2</sub>O<sub>3-x</sub>, ZnO and

1% Rh/ZnO<sub>1-x</sub>.

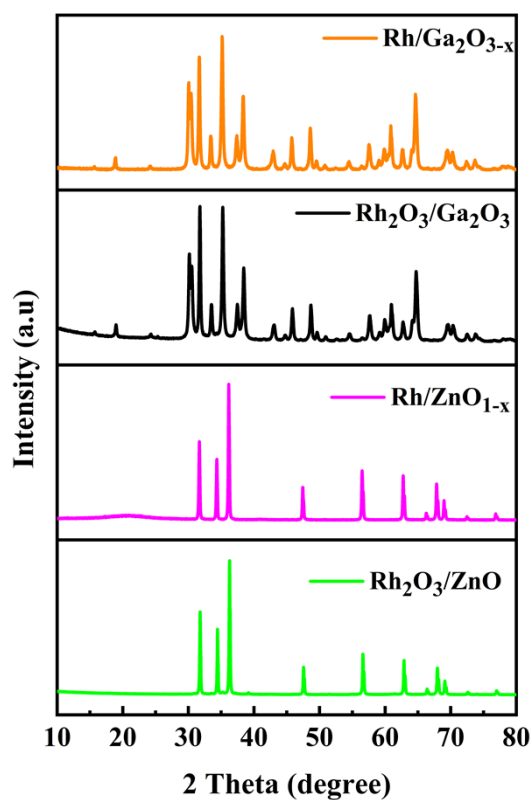

**Figure S14.** XRD of the fresh 1% Rh<sub>2</sub>O<sub>3</sub>/Ga<sub>2</sub>O<sub>3</sub>, 1% Rh<sub>2</sub>O<sub>3</sub>/ZnO the spent 1% Rh/Ga<sub>2</sub>O<sub>3-x</sub> and 1% Rh/ZnO<sub>1-x</sub>.

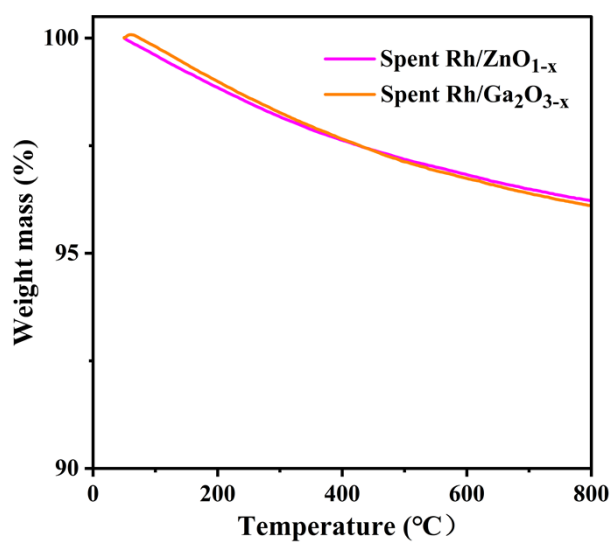

**Figure S15.** TG of the spent 1% Rh/Ga<sub>2</sub>O<sub>3-x</sub> and 1% Rh/ZnO<sub>1-x</sub> catalysts.

## Reference

- 1 H. Song, X. G. Meng, T. D. Dao, W. Zhou, H. M. Liu, L. Shi, H. B. Zhang, T. Nagao, T. Kako and J. H. Ye, *ACS Appl. Mater. Interfaces*, 2018, 10, 408–416.
- 2 H. M. Liu, X. G. Meng, T. D. Dao, L. Q. Liu, P. Li, G. X. Zhao, T. Nagao, L. Q. Yang and J. H. Ye, *J. Mater. Chem. A*, 2017, 5, 10567–10573.
- 3 L. A. Zhou, J. M. P. Martinez, J. Finzel, C. Zhang, D. F. Swearer, S. Tian, H. Robotjazi, M. H. Lou, L. L. Dong, L. Henderson, P. Christopher, E. A. Carter, P. Nordlander and N. J. Halas, *Nat. Energy*, 2020, 5, 61–70.
- 4 L. Sandoval-Diaz, D. Cruz, M. Vuijk, G. Ducci, M. Hävecker, W. L. Jiang, M. Plodinec, A. Hammud, D. Ivanov, T. Götsch, K. Reuter, R. Schlögl, C. Scheurer, A. Knop-Gericke and T. Lunkenbein, *Nat. Catal.*, 2024, DOI: 10.1038/s41929-023-01090-4.
- 5 H. M. Liu, T. D. Dao, L. Q. Liu, X. G. Meng, T. Nagao and J. H. Ye, *Appl. Catal. B Environ.*, 2017, 209, 183–189.
- 6 H. M. Liu, X. G. Meng, T. D. Dao, H. B. Zhang, P. Li, K. Chang, T. Wang, M. Li, T. Nagao and J. H. Ye, *Angew. Chem. Int. Ed.*, 2015, 54, 11545–11549.
- 7 P. Ferreira-Aparicio, A. Guerrero-Ruiz and I. Rodriguez-Ramos, *Appl. Catal. A Gen.*, 1998, 170, 177–187.
- 8 A. I. Paksoy, B. S. Caglayan and A. E. Aksoylu, *Appl. Catal. B Environ.*, 2015, 168, 164–174.
- 9 H. M. Liu, M. Li, T. D. Dao, Y. Y. Liu, W. Zhou, L. Q. Liu, X. G. Meng, T. Nagao and J. H. Ye, *Nano Energy*, 2016, 26, 398–404.
- 10 S. Shoji, X. B. Peng, A. Yamaguchi, R. Watanabe, C. Fukuhara, Y. Cho, T. Yamamoto, S. Matsumura, M. W. Yu, S. Ishii, T. Fujita, H. Abe and M. Miyauchi, *Nat. Catal.*, 2020, 3, 148–153.
- 11 S. A. R. Ahmadi, M. R. Kalaei, O. Moradi, F. Nosratinia and M. Abdouss, *J. Mol. Struct.*, 2022, 1251, 132013.
- 12 Y. Wang, J. Zhao, T. F. Wang, Y. X. Li, X. Y. Li, J. Yin and C. Y. Wang, *J. Catal.*, 2016, 337, 293–302.
- 13 G. Lin, Z. Zhang, Q. Ju, T. Wu, C. U. Segre, W. Chen, H. Peng, H. Zhang, Q. Liu, Z. Liu, Y. Zhang, S. Kong, Y. Mao, W. Zhao, K. Suenaga, F. Huang and J. Wang, *Nat. Commun.*, 2023, 14, 280.
- 14 M. L. Guo, W. Q. Jiang, J. C. Ding and J. Lu, *Fuel*, 2022, 315, 123254.
- 15 A. Staerz, T. H. Kim, J. H. Lee, U. Weimar and N. Barsan, *J. Phys. Chem. C*, 2017, 121, 24701–24706.
- 16 J. P. Wei, J. Yang, Z. H. Wen, J. Dai, Y. Li and B. H. Yao, *Rsc Advances*, 2017, 7, 37508–37521.
- 17 N. Ojha, A. K. Metya and S. Kumar, *Appl. Surf. Sci.*, 2022, 580, 152315.
- 18 P. K. L. Tran, D. T. Tran, D. Malhotra, S. Prabhakaran, D. Kim, N. H. Kim and J. H. Lee, *Small*, 2021, 17, 2103826.
- 19 M. Kurnatowska, M. E. Schuster, W. Mista and L. Kepinski, *Chemcatchem*, 2014, 6, 3125–3131.
